# Supplementary material for: Residues in Transmembrane Segments of the P2X4 Receptor Contribute to Channel Function and Ethanol Sensitivity
Source: Preprints.org preprint supplement (doi:10.20944/preprints202003.0106.v1), 2020-03-06
Supplement: Supplementary file 1 [file supplementary]

Appendix A

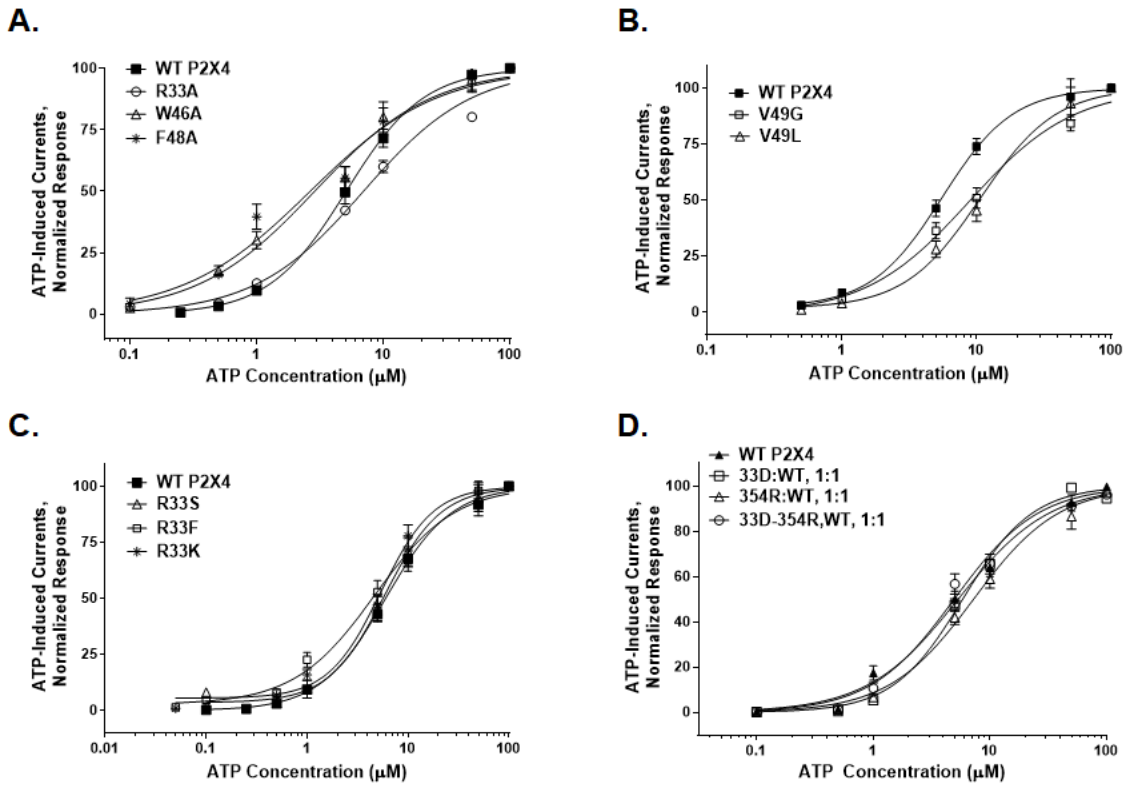

**Supplementary Figure A1.** ATP concentration-response curves for WT and select P2X4R mutants. (a) There was a right-shift in the ATP concentration-response curves for R33A and F48A but not for W46A mutant compared to that of the WT receptor. (b) A right-shift in the ATP concentration-response curves shown for V49G and V49L mutants. (c) Position 33 mutants demonstrated WT-like ATP concentration responses. (d) WT-like ATP concentration responses for position 33 and 354 reciprocal mutant:WT receptor mixtures.
